# Supplementary material for: Type VII Secretion Substrates of Pathogenic Mycobacteria Are Processed by a Surface Protease
Source: PubMed Central journal article supplement (PMC6819658; doi:10.1128/mbio.01951-19), 2019-10-29
Supplement: mBio.01951-19-sf001.pdf [file mBio.01951-19-sf001.pdf]

# S1A

*M. tuberculosis* PE\_PGRS16 structure

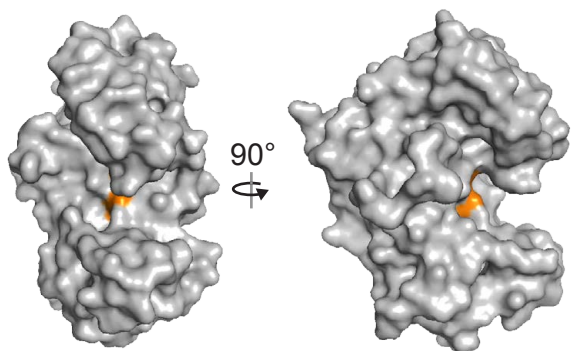

*M. marinum* MMAR\_28540 model

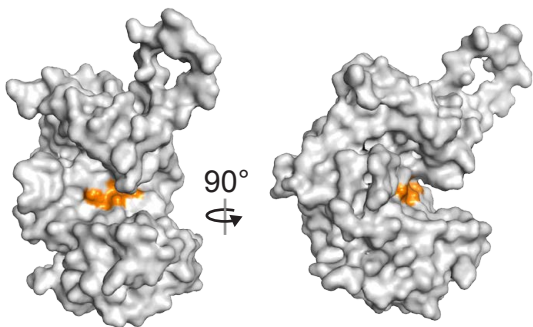

# Figure S1B

PGA3  
HIV-PR  
PE\_PGRS35 (Rv1983)  
**MMARE11\_28540 (MMARE\_2933)**  
MMAR\_2272  
PE\_PGRS16 (Rv0977)  
PE26 (Rv2519)  
MMAR\_1538

WKAPTIVDEQPLENYLDMEYFGTIGI-GTPAQDFTVVFDTGSSNLWVPS-----VYCS  
-----PQVTLWQRPLVTIKI-GGQLKE--ALLDTGADDTV-----LEE  
-----DGRVTPLEIIHVTEPTVHANVNGGPTST--ILVDTGSAGLVVSPEDVGGILGLVLH  
-----**TVPLEVNVTEPVVNVVNGGHSTP--VLIDTGSAGLVMQVKDVGGLGLLR**  
-----PVVVISVGGGGPIA--VTVDTCASGLLVRPQDV----NLQS  
-STTLTNATVPLQLVNTTEPVVVISLNGGQMPV--VLLDTGSTGLVMDS-QF----LTQN  
---DPVNVAVPLRVENNF-PLVNLVNRGPTVP--ILLDTGSSSLVPIFWKI----GWQN  
-----NASVPLYLDNNF-PAVNVSINGGPSVP--VLLDTGSAGLVVPIWDI----GLQN  
:  
:\*\*\*:

PGA3  
HIV-PR  
PE\_PGRS35 (Rv1983)  
**MMARE11\_28540 (MMARE\_2933)**  
MMAR\_2272  
PE\_PGRS16 (Rv0977)  
PE26 (Rv2519)  
MMAR\_1538

SLACTNHNRFNPEDSS----TYQSTSETVSIYGTGSMTGILGYDVTQVGGISDTNQIFG  
MSLP-GRWPKPMIGGI-----GGFIK-----VRQYDQILIE  
MGLPTGLSISGYSGLL----YYIFATYTTTVDGNGIVTAPTA---VNVVLLSIPSPFA  
**MGLPSGISMSAYSGLL----TYLFATYPTTVDFGNGIVTSTTG---VDVVLFSIPTSPYA**  
LGTPTGSGAVTYGNSSYAFNTVQYQYQTTVNFNGIVTNPNTN---VAVATSATQT-ING  
FGPVIGTGAGYAGGL----TYNYNTYSTTVDFGNGLLTLPTS---VNVVTSSSPGTL--  
LGLPTGFDVVHYGNGV---SIVYADVPTTVDFGGAATTPTS---VHVGIPLPYPRNLDS  
LGVPTGFDVIRYNGV---NILYADFNTTVDFGSGAVTAPTS---VQVGILPFPTSLQG  
:  
:\*\*\*:

PGA3  
HIV-PR  
PE\_PGRS35 (Rv1983)  
**MMARE11\_28540 (MMARE\_2933)**  
MMAR\_2272  
PE\_PGRS16 (Rv0977)  
PE26 (Rv2519)  
MMAR\_1538

LS-----ETEPGSFLYYAPFDGILGLAYPSISS---SGATPVFDNIWNQGLVSO  
IC-----GHKAIG-TVLVG---PTPVNII-----  
ISTYFALLADPTTTTPEAYFGAVGVDGVLGVG-PNAV---PGP-SIPTMALPGDLNQG  
**LTTWLNALWSNPLTFPDAYFQSAGVDGVLGVG-PNAV---PGP-SIPTQALGGGLGQG**  
VT-----TSIPLSSLPL-----YLGIG-PNNDF---PLP-DQVTAALPGDLNQG  
-----GNFLRSRGAVGVLGIG-PNNGF---PGTSSIV-TAMPGLLNNG  
LV-----LIASGGAFGPNG-NGILGIG-PNVGSYAVSGPNNVTTDLPGQLNEG  
LT-----LIAMNGFGPTG-HGVLGIG-PNINA-ATGGHGNVTTALPGQLNEG  
:  
:\*\*\*:

PGA3  
HIV-PR  
PE\_PGRS35 (Rv1983)  
**MMARE11\_28540 (MMARE\_2933)**  
MMAR\_2272  
PE\_PGRS16 (Rv0977)  
PE26 (Rv2519)  
MMAR\_1538

DLFSVYLSADDQSGSVVIFGGIDSSYYTGSNLWVPTVEGYWQITVDSITMNGEAIACAE  
-----GRNLLTQIGCTLNFPQVTL---WQRPLVTIKIGGQLKE---  
VLI-----DAPAGELVFGPNPLPAPNVVEVVGSPITT---LYVKID---GGTPIPVV  
**LLI-----DMKGELVFGPNPL-TPEFSISGAPIAT---LWVSVN---GGAPVAVP-**  
VLI-----NTNLGYLQFGANPL-TPVASVTGSPVTD---LQIQIN---NGPLQPATG  
VLI-----DESAGILQFGPNTL-TGGITISGAPIST---VAVQID---NGPLQQAP-  
TLI-----DIPGGYMQFGPNTG-TPITSVTGAPITV---LNVQIGGYDPNGGYWSLP-  
ELI-----NIPQGYMQFGPNTG-TPITSVSGVPITT---LDVQFGGYDPLGTYYVPT-  
:  
:\*\*\*:

PGA3  
HIV-PR  
PE\_PGRS35 (Rv1983)  
**MMARE11\_28540 (MMARE\_2933)**  
MMAR\_2272  
PE\_PGRS16 (Rv0977)  
PE26 (Rv2519)  
MMAR\_1538

GCQAIVDTGTSLLTGPTSPIANIQSDIGASENSD-GDMVVSCSAISSLPDIVFTINGVQY  
---ALLDTGADDTVLEEMSLP---GRWPKPMIGGIGGFIKVRQYDQILIEICGHKAIGT  
---SIIDSGGVTGTIPSYVIG---SGTLP---ANTNIEVYTPG-GDRLYAFNTNDY  
---**SIIDSGVMGTIPSSVIG---GSTLP---ANTNITVYTDNTMTTEVYHYSTNDY**  
---SFIIDSGGLYGTIPSSLI PGVPVGYVSVV---VGTITVYTTDQ--VQLYSQVTVGS  
---VMFDSGGINGTIPSA-LASLPSGGFV---AGTTISVYTSDG-QTLLYSYTTTAT  
---SIFDSGGNHGTLPAVILGTGQTTGYAP---PGTVISISIHND-QTLLYQYTTTAS  
---SIVDSGGNHGTLPGIILGTGQTSVGPV---PGTVISISTNDN-QTLLYSYTTTGT  
:  
:\*\*\*:

PGA3  
HIV-PR  
PE\_PGRS35 (Rv1983)  
**MMARE11\_28540 (MMARE\_2933)**  
MMAR\_2272  
PE\_PGRS16 (Rv0977)  
PE26 (Rv2519)  
MMAR\_1538

PVPPSAYILQSEGCISGFGQMNLPTESEGLWILGDVVFIRQYFTVFDNRANQVGLAPVA-  
-----VLVGPTPVN-----IIGR-----NLLTQIGCT-L  
R-P---TVISSGLMNTGF---LP-----FRFQPVYID-----YSPSGIGTTVF  
**Q-P---TVISSGLMNTGF---LP-----FWNQPVYID-----YSPAGTGTTF**  
TNAPL--VVPSSNNPNTGN---YP-----FLLGPIYIS-----NSPTGGGQTIF  
NTP---FVTSGGVMNTGH---VP-----FAQQPIYVS-----YSPTAIGTTTT  
NSP---VVTADPRLNTGL---TP-----FLLGPVYIS-----NNPSGVGTVVV  
DSP---VVTGNI PMNTGL---LP-----FALGPVYIS-----NSPSGVGTVVV  
:  
:\*\*\*:

PGA3  
HIV-PR  
PE\_PGRS35 (Rv1983)  
**MMARE11\_28540 (MMARE\_2933)**  
MMAR\_2272  
PE\_PGRS16 (Rv0977)  
PE26 (Rv2519)  
MMAR\_1538

-----  
NF---  
DHPA-  
**DMP--**  
DF---  
N---  
NYPPP  
NYPPP
