# Supplementary material for: Type VII Secretion Substrates of Pathogenic Mycobacteria Are Processed by a Surface Protease
Source: PubMed Central journal article supplement (PMC6819658; doi:10.1128/mbio.01951-19), 2019-10-29

# S2

kDa

wild type

LipY<sub>A150D</sub>

70

55

40

35

25

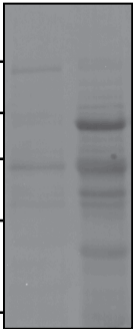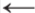

Supplement: mBio.01951-19-sf002.pdf [file mBio.01951-19-sf002.pdf]
