# Supplementary material for: Type VII Secretion Substrates of Pathogenic Mycobacteria Are Processed by a Surface Protease
Source: PubMed Central journal article supplement (PMC6819658; doi:10.1128/mbio.01951-19), 2019-10-29

**S5****A**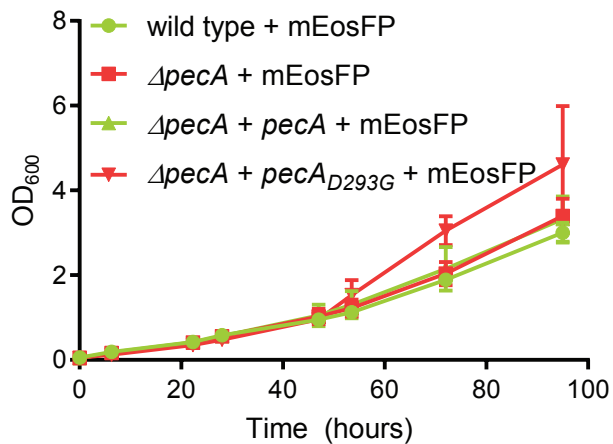**B**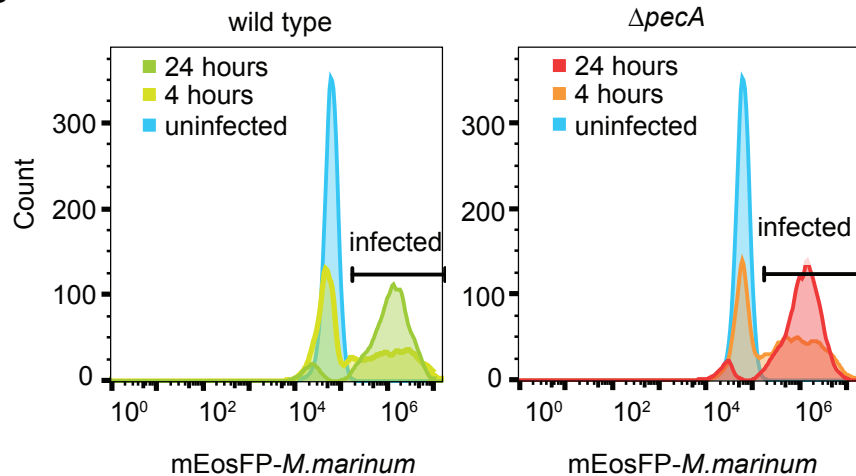**C**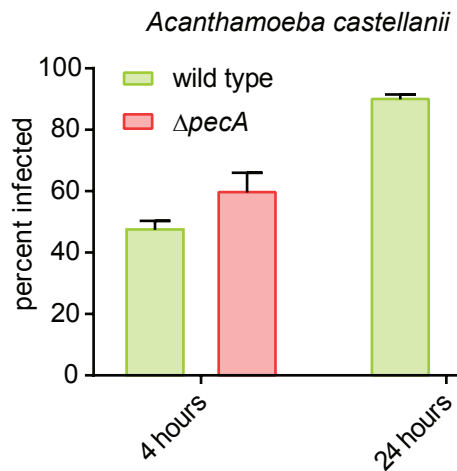**D**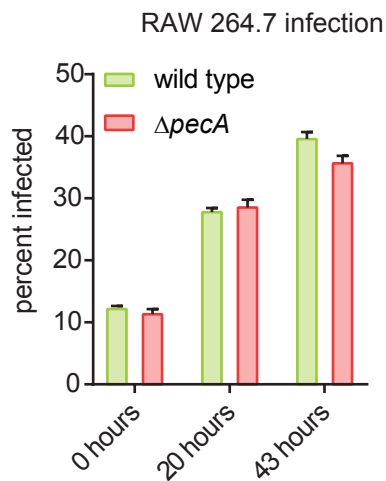

Supplement: mBio.01951-19-sf005.pdf [file mBio.01951-19-sf005.pdf]
