# Supplementary material for: Type VII Secretion Substrates of Pathogenic Mycobacteria Are Processed by a Surface Protease
Source: PubMed Central journal article supplement (PMC6819658; doi:10.1128/mbio.01951-19), 2019-10-29
Supplement: mBio.01951-19-st001.pdf [file mBio.01951-19-st001.pdf]

**Table S1**

| <b>Primer name</b>         | <b>Primer sequence 5' → 3'</b>            |
|----------------------------|-------------------------------------------|
| PecA-pMV-Fw                | CCGGAGGAAAGAATCCATGTGTCGCTTCTGGTGGTG      |
| PecA-pMV-Rv                | CGACATCGATAAGCTTCTAAGGGTTGTTGAAGACCGTTGTG |
| Rv1983-Fw                  | AAAGAATCCATGTGTCATTTCTGGTCGTGGT           |
| Rv1983-Rv                  | TTTCTCGAGGGATGATCAAAGACTGTTGTCCC          |
| PecA-pET-Fw                | AGGAGATATACCATGTGTCGCTTCTGGTGGTGG         |
| PecA-pET-Rv                | GGTGGTGGTGCTCGAGCAAGTCCTCTCCGAAATCAGCTTT  |
| PecA-A89D                  | TCGGCCGGGTCATACGCGGACGCCGAGGCCAGTCCGTG    |
| PecA <sub>A89D</sub> -A88E | CCGGGTCATACGAGGACGCCGAGGC                 |
| PecA-A84D                  | CTGAACTCATCGGACGGGTCATACGCG               |
| MMAR_2933 LF               | TTTTTTTTCACAAAGTGGCCGACACTCTTGATGTTGA     |
| MMAR_2933 LR               | TTTTTTTTCACTTCGTGGCTGATCGCCTGGTATTCT      |
| MMAR_2933 RF               | TTTTTTTTCACAGAGTGACTACCAGCCGACGGTCATT     |
| MMAR_2933 RR               | TTTTTTTTCACCTTGTGCGTGGCTTCACTGCCTACTT     |
