# Supplementary material for: Type VII Secretion Substrates of Pathogenic Mycobacteria Are Processed by a Surface Protease
Source: PubMed Central journal article supplement (PMC6819658; doi:10.1128/mbio.01951-19), 2019-10-29
Supplement: mBio.01951-19-st002.pdf [file mBio.01951-19-st002.pdf]

**Table S2**

| experiment # | wild type   |     |      | $\Delta pecA$ |     |      | $\Delta pecA+pecA$ |      |      | $\Delta pecA+pecA_{D293G}$ |      |      |
|--------------|-------------|-----|------|---------------|-----|------|--------------------|------|------|----------------------------|------|------|
|              | # of larvae | pre | post | # of larvae   | pre | post | # of larvae        | pre  | post | # of larvae                | pre  | post |
| 1            | 11          | 73  | 80   | 8             | 42  | 39   | n.d.               | n.d. | n.d. | n.d.                       | n.d. | n.d. |
| 2            | 20          | 2   | 6    | 20            | 5   | 2    | 18                 | 12   | 6    | 19                         | 4    | 7    |
| 3            | 22          | 196 | 145  | 21            | 121 | 83   | 20                 | 241  | 190  | 23                         | 102  | 89   |
| 4            | 22          | 20  | 17   | 22            | 38  | 30   | 24                 | 24   | 24   | 23                         | 39   | 52   |
| Total larvae | 75          |     |      | 71            |     |      | 62                 |      |      | 65                         |      |      |
